# Supplementary material
Source: PubMed Central journal article supplement (PMC535449)

## Treatment of migraine with metoclopramide

**Figure A. [As supplied by authors]** Metoclopramide plus other agents vs. other agents, in terms of reduction of headache pain on a VAS.

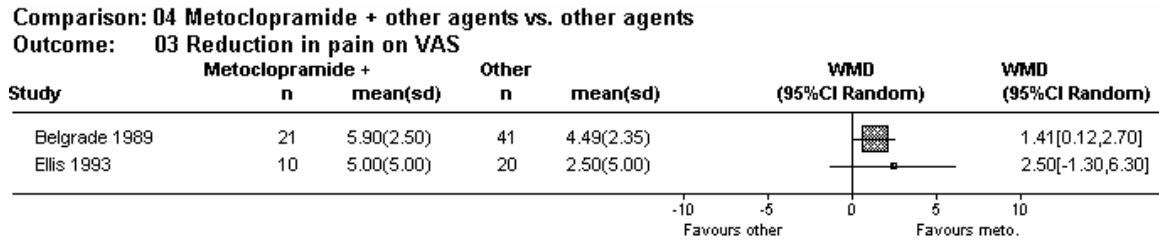

Supplement: bmj_38281.595718.7C_2.pdf [file bmj_38281.595718.7C_2.pdf]
