# Supplementary material
Source: PubMed Central journal article supplement (PMC535449)
Supplement: bmj_38281.595718.7Cv2_1.pdf [file bmj_38281.595718.7Cv2_1.pdf]

## Additional forest plots and details of excluded trials

**Figure A. [As supplied by authors]** Metoclopramide plus other agents vs. other agents, in terms of reduction of headache pain on a VAS.

Comparison: 04 Metoclopramide + other agents vs. other agents

Outcome: 03 Reduction in pain on VAS

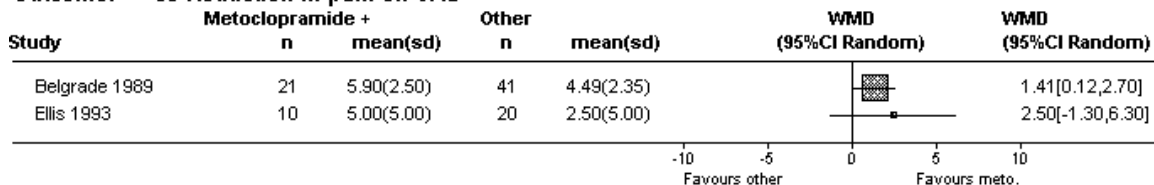

**Figure B. [As supplied by authors]** Metoclopramide plus other agents vs. other agents, in terms of patients with an improvement in functional ability.

Comparison: 04 Metoclopramide + other agents vs. other agents

Outcome: 04 Improvement in functional ability

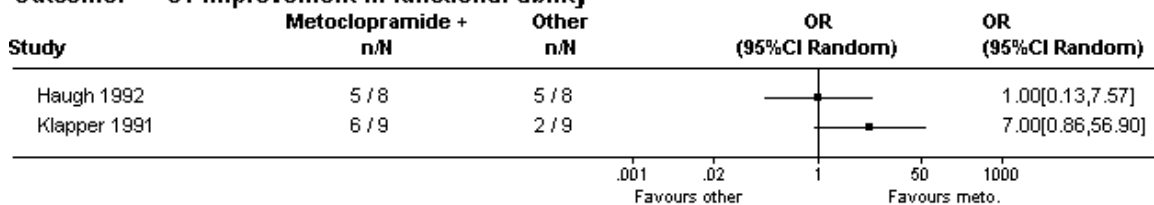

**Figure C. [As supplied by authors]** Metoclopramide plus other agents vs. other agents, in terms of patients with a reduction in nausea

Comparison: 04 Metoclopramide + other agents vs. other agents

Outcome: 06 Patients with reduction in nausea

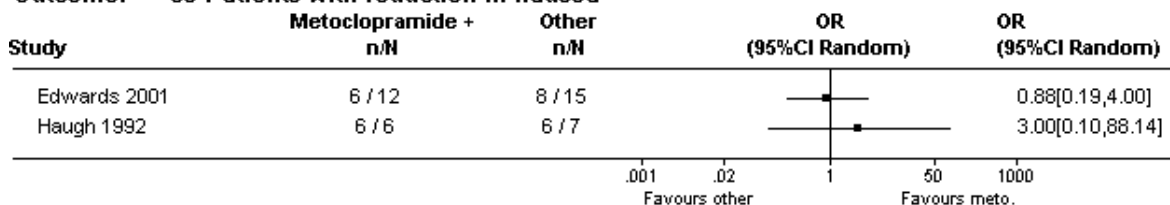

**Figure D. [As supplied by authors]** Metoclopramide plus other agents vs. other agents, in terms of patients with a relapse migraine headache

Comparison: 04 Metoclopramide + other agents vs. other agents

Outcome: 08 Relapse of migraine

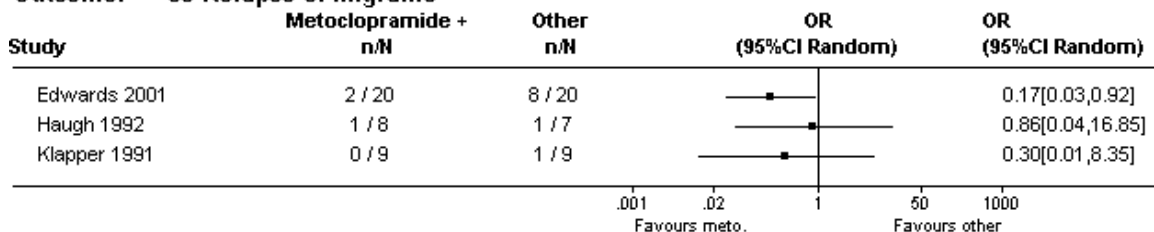

**Supplementary Table 1 [As supplied by authors].** Studies excluded from the review.

| Study reference                                                                                                                                                                                                                                                                               | Reason for exclusion                                                                                                          |
|-----------------------------------------------------------------------------------------------------------------------------------------------------------------------------------------------------------------------------------------------------------------------------------------------|-------------------------------------------------------------------------------------------------------------------------------|
| 1. Becker A, Buck W, Vogtle-Junkert U. Analgesia and antiemesis as therapeutic aims in the treatment of migraine. <i>Medizinische Welt</i> 1988;39:473-476.                                                                                                                                   | Patients received oral treatment                                                                                              |
| 2. Brito Neto AJ. [Evaluation of therapeutic efficacy and tolerability of an association including ergot compound, analgesic and antiemetic for treatment of migraine attacks] [Portuguese]. <i>Revista Brasileira de Medicina</i> . 1993;50:89-94.                                           | Patients were not randomly assigned to treatment arms                                                                         |
| 3. Chabriat H, Joire JE, Danchot J, Gripon P, Bousser MG. Combined oral lysine acetylsalicylate and metoclopramide in the acute treatment of migraine: a multicentre double-blind placebo-controlled study. <i>Cephalalgia</i> 1994;14:297-300.                                               | Patients received oral treatment                                                                                              |
| 4. Cunha J, Brito Neto AJ. Evaluation of therapeutic efficacy and tolerability of the association dihydroergotamine, paracetamol, metoclopramide for migraine attacks. <i>Revista Brasileira de Medicina</i> 1994;51:767-773.                                                                 | Patients were not randomly assigned to treatment arms                                                                         |
| 5. Dexter SL, Graham AN, Johnston ES, Ratcliffe DM, Wilkinson MI, Rose AJ. Double-blind controlled study of paramax in the acute treatment of common and classical migraine. <i>British Journal of Clinical Practice</i> 1985;39:388-392.                                                     | Patients received oral treatment                                                                                              |
| 6. Geraud G, Compagnon A, Rossi A. Zolmitriptan versus a combination of acetylsalicylic acid and metoclopramide in the acute oral treatment of migraine: a double-blind, randomised, three-attack study. <i>European Neurology</i> 2002;47:88-98.                                             | Patients received oral treatment                                                                                              |
| 7. Hakkarainen H, Parantainen J, Gothoni G, Vapaatalo H. Tolfenamic acid and caffeine: a useful combination in migraine. <i>Cephalalgia</i> 1982;2:173-177.                                                                                                                                   | Patients received oral treatment                                                                                              |
| 8. Hakkarainen H. Ergotamine vs. metoclopramide vs. their combination in acute migraine attacks. <i>Headache</i> 1982;22:10-12.                                                                                                                                                               | Patients received suppository treatment                                                                                       |
| 9. Henry P, Hiesse-Provost O, Dillenschneider A, Ganry H, Insuasty J. [Efficacy and tolerance of an effervescent aspirin-metoclopramide combination in the treatment of a migraine attack: a randomized double-blind study using a placebo] [French]. <i>Presse Medicale</i> 1995;24:254-258. | Patients received oral treatment                                                                                              |
| 10. Jovicic A, Maric D, Ilic T. [Treatment of acute migraine attacks] [Serbo-Croatian (Roman)]. <i>Vojnosanitetski Pregled</i> 1995;52:44-48.                                                                                                                                                 | Patients were not randomly assigned to treatment arms                                                                         |
| 11. Klapper J, Stanton J. The emergency treatment of acute migraine headache: A comparison of intravenous dihydroergotamine, dexamethasone, and placebo. <i>Cephalalgia</i> 1991;11:159-160.                                                                                                  | Both treatment arms received the same dosage of metoclopramide. A third treatment arm received placebo, however the first two |

|                                                                                                                                                                                                                                                                                                               |                                                                                                                                                           |
|---------------------------------------------------------------------------------------------------------------------------------------------------------------------------------------------------------------------------------------------------------------------------------------------------------------|-----------------------------------------------------------------------------------------------------------------------------------------------------------|
|                                                                                                                                                                                                                                                                                                               | treatment arms received metoclopramide with other treatments - metoclopramide plus other agents versus placebo was not considered useful for this review. |
| 12. Le Jeune C, Gomez JP, Pradalier A, Albareda F, Joffroy A, Liano H, Henry P, Lainez JM, Geraud G. Comparative efficacy and safety of calcium carbasalate plus metoclopramide versus ergotamine tartrate plus caffeine in the treatment of acute migraine attacks. <i>European Neurology</i> 1999;41:37-43. | Patients received oral treatment                                                                                                                          |
| 13. Lipton RB, Stewart WF, Stone AM, Lainez MJ, Sawyer JP. Stratified care vs step care strategies for migraine: the Disability in Strategies of Care (DISC) Study: A randomized trial. <i>JAMA</i> 2000;284:2599-2605.                                                                                       | Patients received oral treatment                                                                                                                          |
| 14. Matts SG. Metoclopramide in the treatment of migraine. <i>Practitioner</i> 1974;212:887-890.                                                                                                                                                                                                              | Patients received oral treatment                                                                                                                          |
| 15. Pradalier A, Guerard des Lauriers A, Scheck F, Peraudeau P, Lacoste JP, Cajfinger F. [Calcium carbasalate-metoclopramide combination versus dihydroergotamine in the treatment of migraine attacks] [French]. <i>Pathologie et Biologie</i> 1995;43:806-813.                                              | Patients received oral treatment                                                                                                                          |
| 16. Schulman EA, Dermott KF. The efficacy of sumatriptan plus metoclopramide in migraine patients who were triptan non-responsive. <i>Cephalalgia</i> 2001;21:417.                                                                                                                                            | Patients received oral treatment                                                                                                                          |
| 17. Tfelt-Hansen P, Olesen J. Effervescent metoclopramide and aspirin (Migravess) versus effervescent aspirin or placebo for migraine attacks: a double-blind study. <i>Cephalalgia</i> 1984;4:107-111.                                                                                                       | Patients received oral treatment                                                                                                                          |
| 18. Tfelt-Hansen P, Henry P, Mulder LJ, Scheldewaert RG, Schoenen J, Chazot G. The effectiveness of combined oral lysine acetylsalicylate and metoclopramide compared with oral sumatriptan for migraine. <i>Lancet</i> 1995;346:923-926.                                                                     | Patients received oral treatment                                                                                                                          |
| 19. The Oral Sumatriptan and Aspirin plus Metoclopramide Comparative Study Group. A study to compare oral sumatriptan with oral aspirin plus oral metoclopramide in the acute treatment of migraine. <i>European Neurology</i> 1992;32:177-184.                                                               | Patients received oral treatment                                                                                                                          |
| 20. Titus F, Escamilla C, Gomes Da Costa Palmeira MM, Leira R, Pereira Monteiro JMP. A double-blind comparison of lysine acetylsalicylate plus metoclopramide vs ergotamine plus caffeine in migraine: Effects on nausea, vomiting and headache symptoms. <i>Clinical Drug Investigation</i> 2001;21:87-94.   | Patients received oral treatment                                                                                                                          |
| 21. Tokola RA, Kangasniemi P, Neuvonen PJ, Tokola O. Tolfenamic acid, metoclopramide, caffeine and their combinations in the treatment of migraine attacks. <i>Cephalalgia</i> 1984;4:253-263.                                                                                                                | Patients received oral treatment                                                                                                                          |
